# Supplementary material for: Combinations of chiral and prochiral singlet radical-pairs in reaction cavities of polyethylene films. Control and analysis of radical tumbling and translation
Source: Royal Society of Chemistry journal article supplement (doi:10.1039/b419493d), 2005-03-03
Supplement: b419493d.pdf [file b419493d.pdf]

Supporting information for

**Chiral and Prochiral Singlet Radical-Pair Combinations in Reaction Cavities of Polyethylene Films. Control and Analysis of Radical Tumbling and Translation.**

Jinqi Xu and Richard G. Weiss\*

*Department of Chemistry, Georgetown University*

*Washington, DC 20057-1227, USA*

**Table S1.** Product distributions from irradiations of (*R*)-**2** in unstretched **PE0** films at 23 °C<sup>a</sup>

| %Conversion of ( <i>R</i> )- <b>2</b> | <b>2BN</b> | <b>4BN</b> | <b>3</b> | <b>5</b> | <b>6</b> | <b>2BN/4BN</b> | ( <i>S</i> )- <b>2</b> /( <b>2BN</b> + <b>4BN</b> ) |
|---------------------------------------|------------|------------|----------|----------|----------|----------------|-----------------------------------------------------|
| 3                                     | 43.6±0.8   | 36.3±1.5   | 17.8±0.8 | 0.7±0.5  | 1.6±0.5  | 1.20±0.05      | 0.18±0.04                                           |
| 4                                     | 42.5±1.0   | 37.9±1.7   | 16.5±1.2 | 1.5±0.5  | 1.6±0.5  | 1.12±0.04      | 0.18±0.04                                           |
| 5                                     | 37.7±1.0   | 35.4±1.4   | 22.7±2.2 | 2.9±0.5  | 1.3±0.5  | 1.06±0.04      | 0.21±0.03                                           |
| 6                                     | 36.2±0.5   | 36.9±0.5   | 24.3±1.2 | 1.2±0.5  | 1.4±0.5  | 0.98±0.04      | 0.17±0.03                                           |
| 7                                     | 30.1±1.2   | 30.8±1.0   | 29.7±1.5 | 7.5±1.0  | 1.9±0.5  | 0.98±0.04      | 0.18±0.03                                           |
| 11                                    | 29.3±1.0   | 30.1±1.1   | 26.0±1.5 | 13.1±1.0 | 1.5±0.5  | 0.98±0.04      | 0.16±0.02                                           |
| 13                                    | 33.8±1.3   | 35.5±1.0   | 21.8±1.0 | 7.5±1.0  | 1.4±0.5  | 0.96±0.04      | 0.17±0.02                                           |
| 15                                    | 34.7±1.0   | 37.1±1.0   | 18.9±0.7 | 7.8±1.0  | 1.5±0.5  | 0.93±0.04      | 0.16±0.02                                           |
| 21                                    | 31.5±0.5   | 38.6±0.5   | 23.1±1.4 | 5.2±1.0  | 1.6±0.5  | 0.82±0.04      | 0.15±0.01                                           |

<sup>a</sup> Relative yield (%); the sum of relative yields of all products is taken as 100%; the mass balance is > 80%; entries are the average values from at least 3 HPLC analyses on two separate runs with an error of one standard deviation; < 3.5% of **4** was observed when the conversion of (*R*)-**2** was > 13%.

**Table S2.** *Ee*% of photoproducts from irradiations of (*R*)-**2**<sup>a</sup> in unstretched **PE0** films at 23 °C<sup>b</sup>

| % Conversion of ( <i>R</i> )- <b>2</b> | <i>ee</i> %        |            |            |
|----------------------------------------|--------------------|------------|------------|
|                                        | remaining <b>2</b> | <b>2BN</b> | <b>4BN</b> |
| 3                                      | 99.2               | 56.4       | 41.4       |
| 4                                      | 98.8               | 55.4       | 41.2       |
| 5                                      | 98.4               | 54.8       | 40.4       |
| 6                                      | 98.4               | 54.8       | 40.8       |
| 7                                      | 98.4               | 53.0       | 38.8       |
| 11                                     | 97.8               | 54.8       | 39.2       |
| 13                                     | 96.6               | 55.6       | 40.4       |
| 15                                     | 96.0               | 55.0       | 39.7       |
| 21                                     | 94.6               | 53.2       | 37.9       |

<sup>a</sup> *ee* of (*R*)-**2** before irradiation is 99.5%. <sup>b</sup> ± 1.0%.

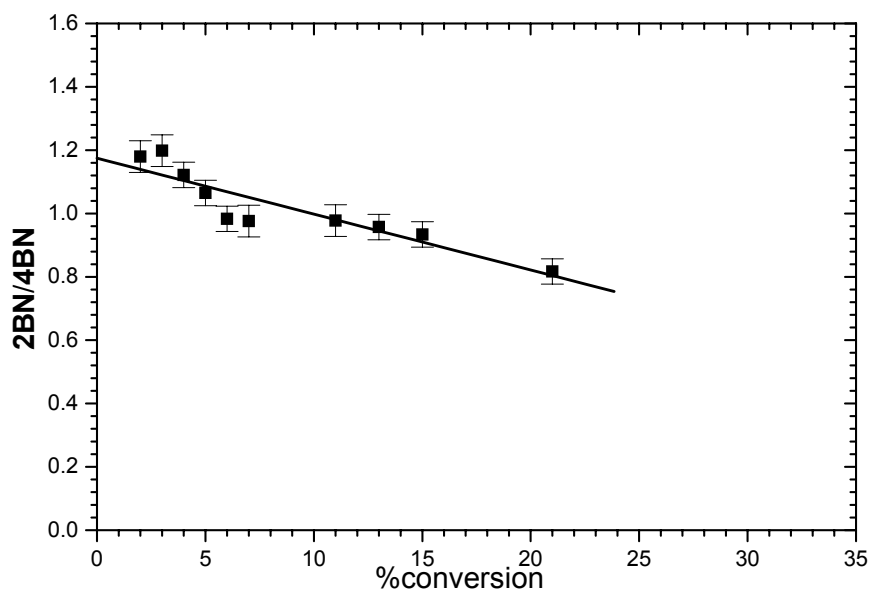

**Figure S1.** 2BN/4BN ratio *versus* percent of conversion of (*R*)-**2** in unstretched PE0 films at 23 °C. The straight line is the best fit to data points below *ca.* 20% conversions of (*R*)-**2** and it provides the value extrapolated to 0% conversion.

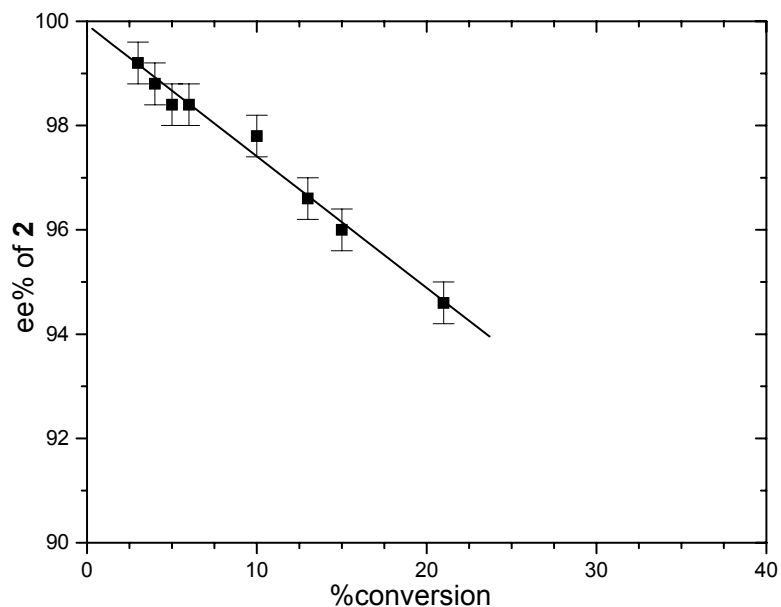

**Figure S2.** The ee% of **2** remaining after irradiation *versus* percent of conversion for irradiations of (*R*)-**2** in unstretched PE0 films at 23 °C. The straight line is the best fit to data points below *ca.* 20% conversions of (*R*)-**2** and it provides the value extrapolated to 0% conversion.

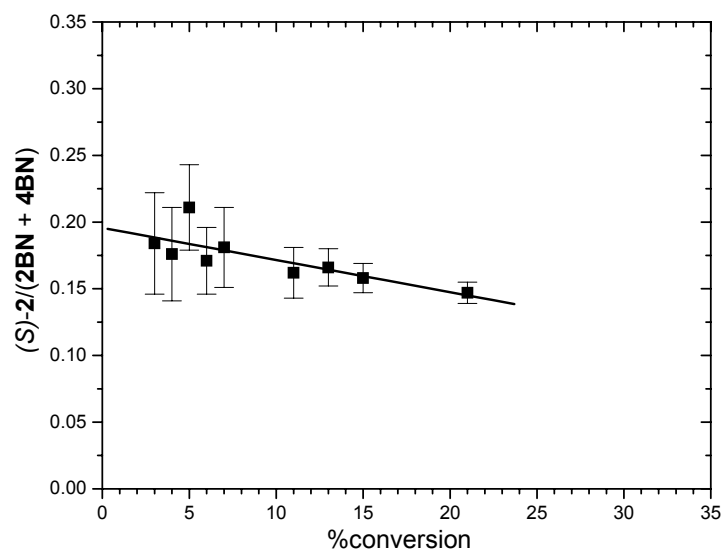

**Figure S3.**  $(S)\text{-}2/(2\text{BN} + 4\text{BN})$  versus percent of conversion for irradiations of  $(R)\text{-}2$  in unstretched **PE0** films at 23 °C. The straight line is the best fit to data points below *ca.* 20% conversions of  $(R)\text{-}2$  and it provides the value extrapolated to 0% conversion.

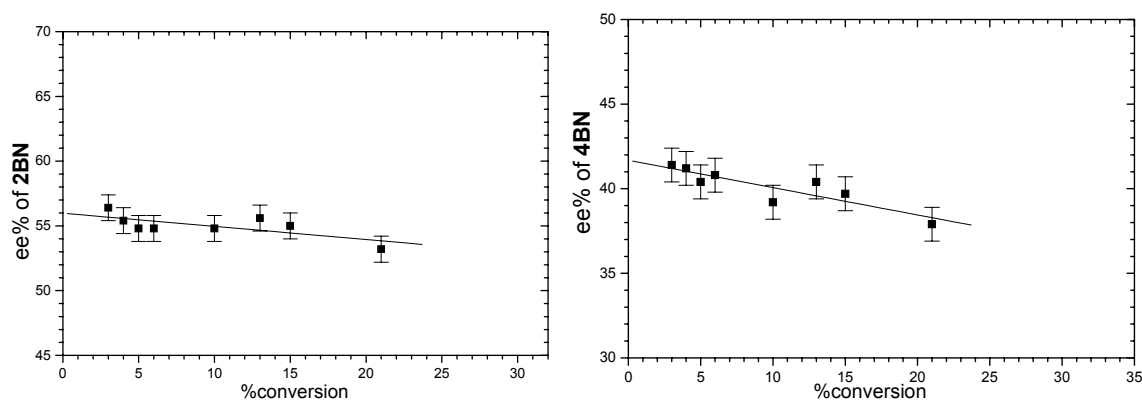

**Figure S4.** *Ee%* of **2BN** (left) and **4BN** (right) versus percent of conversion for irradiations of  $(R)\text{-}2$  in unstretched **PE0** films at 23 °C. The straight line is the best fit to data points below *ca.* 20% conversions of  $(R)\text{-}2$  and it provides the value extrapolated to 0% conversion.

**Table S3.** Product distributions from irradiations of  $(R)\text{-}2$  in stretched **PE0** films at 23 °C<sup>a</sup>

| %Conversion of $(R)\text{-}2$ | <b>2BN</b> | <b>4BN</b> | <b>3</b> | <b>5</b> | <b>6</b> | <b>2BN/4BN</b> | $(S)\text{-}2/(2\text{BN} + 4\text{BN})$ |
|-------------------------------|------------|------------|----------|----------|----------|----------------|------------------------------------------|
| 3                             | 39.0±2.8   | 30.1±1.4   | 25.7±1.8 | 4.4±1.0  | 0.8±0.5  | 1.29±0.05      | 0.20±0.05                                |
| 4                             | 39.5±2.0   | 31.9±1.5   | 24.7±1.5 | 3.2±1.0  | 0.7±0.5  | 1.24±0.05      | 0.17±0.04                                |

|    |          |          |          |         |         |           |           |
|----|----------|----------|----------|---------|---------|-----------|-----------|
| 7  | 36.7±1.0 | 31.3±1.6 | 25.2±1.5 | 6.2±1.0 | 0.6±0.5 | 1.17±0.05 | 0.16±0.03 |
| 9  | 39.5±2.0 | 36.0±1.4 | 20.4±1.1 | 3.3±1.0 | 0.8±0.5 | 1.10±0.04 | 0.16±0.02 |
| 15 | 31.8±1.0 | 35.3±2.4 | 28.7±1.9 | 3.4±1.0 | 0.8±0.5 | 0.90±0.04 | 0.16±0.02 |
| 16 | 30.7±1.2 | 40.4±1.3 | 25.0±1.1 | 3.0±1.0 | 0.9±0.5 | 0.76±0.04 | 0.15±0.02 |

<sup>a</sup> Relative yield (%); the sum of relative yields of all products is taken as 100%; the mass balance is > 80%; entries are the average values from at least 3 HPLC analyses on two separate runs with an error of one standard deviation; the yield of **4** was below our detection limit.

**Table S4.** *Ee*% of photoproducts from irradiations of (*R*)-**2**<sup>a</sup> in stretched **PE0** films at 23 °C<sup>b</sup>

| % Conversion of ( <i>R</i> )- <b>2</b> | <i>ee</i> %        |            |            |
|----------------------------------------|--------------------|------------|------------|
|                                        | remaining <b>2</b> | <b>2BN</b> | <b>4BN</b> |
| 3                                      | 99.2               | 57.9       | 43.3       |
| 4                                      | 99.0               | 55.8       | 40.3       |
| 7                                      | 98.4               | 54.6       | 38.6       |
| 9                                      | 97.8               | 54.8       | 37.4       |
| 15                                     | 96.0               | 54.6       | 36.2       |
| 16                                     | 96.0               | 53.6       | 34.6       |

<sup>a</sup> *ee* of (*R*)-**2** before irradiation is 99.5%. <sup>b</sup> ± 1.0%.

**Table S5.** Product distributions from irradiations of (*R*)-**2** in unstretched **PE46** films at 23 °C<sup>a</sup>

| %Conversion of ( <i>R</i> )- <b>2</b> | <b>2BN</b> | <b>4BN</b> | <b>3</b> | <b>5</b> | <b>6</b> | <b>2BN/4BN</b> | ( <i>S</i> )- <b>2</b> /( <b>2BN</b> + <b>4BN</b> ) |
|---------------------------------------|------------|------------|----------|----------|----------|----------------|-----------------------------------------------------|
| 4                                     | 37.5±1.1   | 28.9±1.1   | 27.1±1.1 | 5.3±0.5  | 1.2±0.5  | 1.30±0.06      | 0.22±0.04                                           |
| 6                                     | 42.5±1.0   | 33.4±1.0   | 22.6±1.0 | 0.5±0.5  | 1.0±0.5  | 1.27±0.05      | 0.19±0.03                                           |
| 9                                     | 42.3±2.4   | 35.7±1.1   | 18.1±1.0 | 2.6±0.5  | 1.3±0.5  | 1.19±0.08      | 0.17±0.02                                           |
| 10                                    | 42.2±1.0   | 35.2±1.0   | 21.1±1.0 | 0.3±0.5  | 1.2±0.5  | 1.20±0.04      | 0.17±0.02                                           |
| 15                                    | 41.5±1.0   | 35.7±1.0   | 21.2±1.0 | 0.2±0.5  | 1.4±0.5  | 1.16±0.04      | 0.17±0.02                                           |
| 21                                    | 35.1±1.0   | 37.9±0.5   | 23.9±1.0 | 1.5±0.5  | 1.6±0.5  | 0.93±0.03      | 0.17±0.01                                           |
| 22                                    | 32.8±0.7   | 37.5±1.2   | 27.1±1.1 | 1.3±0.5  | 1.3±0.5  | 0.88±0.03      | 0.17±0.01                                           |
| 24                                    | 33.0±0.5   | 43.1±0.5   | 21.9±2.1 | 0.2±0.5  | 1.8±0.5  | 0.76±0.02      | 0.17±0.01                                           |
| 29                                    | 25.1±0.4   | 43.5±0.7   | 24.0±1.0 | 5.4±0.5  | 2.0±0.5  | 0.58±0.02      | 0.16±0.01                                           |

<sup>a</sup> Relative yield (%); the sum of relative yields of all products is taken as 100%; the mass balance is > 80%; entries are the average values from at least 3 HPLC analyses on two separate runs with an error of one standard deviation; < 1.5% of **4** was observed when the conversion of (*R*)-**2** was > 15%.

**Table S6.** *Ee*% of photoproducts from irradiations of (*R*)-**2**<sup>a</sup> in unstretched **PE46** films at 23 °C<sup>b</sup>

| % Conversion of ( <i>R</i> )-2 | <i>ee</i> % |      |      |
|--------------------------------|-------------|------|------|
|                                | remaining 2 | 2BN  | 4BN  |
| 4                              | 98.6        | 48.8 | 31.9 |
| 5                              | 98.4        | 48   | 32.8 |
| 6                              | 98.2        | 48.8 | 32.4 |
| 9                              | 97.4        | 47.2 | 30.6 |
| 10                             | 97.0        | 48.1 | 32.0 |
| 14                             | 95.6        | 47.4 | 30.9 |
| 15                             | 95.2        | 46.8 | 30.4 |
| 22                             | 93.6        | 46.8 | 29.8 |
| 24                             | 92.2        | 44.3 | 28.5 |
| 29                             | 91.4        | 43.7 | 27.8 |

<sup>a</sup> *ee* of (*R*)-2 before irradiation is 99.5%. <sup>b</sup> ± 1.0%.

**Table S7.** Product distributions from irradiations of (*R*)-2 in stretched PE46 films at 23 °C<sup>a</sup>

| %Conversion of ( <i>R</i> )-2 | 2BN      | 4BN      | 3        | 5       | 6       | 2BN/4BN   | ( <i>S</i> )-2/(2BN + 4BN) |
|-------------------------------|----------|----------|----------|---------|---------|-----------|----------------------------|
| 5                             | 46.8±2.0 | 35.5±1.0 | 13.4±1.0 | 4.1±0.5 | 0.2±0.1 | 1.32±0.07 | 0.18±0.03                  |
| 6                             | 46.1±1.1 | 35.4±1.1 | 12.8±1.0 | 5.5±0.5 | 0.2±0.1 | 1.30±0.05 | 0.23±0.03                  |
| 7                             | 47.0±3.2 | 38.2±1.6 | 14.3±1.5 | 0.3±0.5 | 0.2±0.1 | 1.23±0.10 | 0.23±0.03                  |
| 9                             | 46.0±0.5 | 35.2±1.0 | 14.9±1.0 | 3.7±0.5 | 0.2±0.1 | 1.31±0.04 | 0.23±0.03                  |
| 10                            | 46.0±1.0 | 35.9±1.4 | 14.0±1.0 | 3.9±0.5 | 0.2±0.1 | 1.28±0.06 | 0.22±0.02                  |
| 11                            | 46.0±1.1 | 38.7±0.9 | 13.3±0.9 | 1.9±0.5 | 0.1±0.1 | 1.19±0.04 | 0.18±0.02                  |
| 19                            | 41.9±1.0 | 40.0±1.0 | 15.3±0.5 | 2.5±0.5 | 0.3±0.1 | 1.05±0.04 | 0.21±0.01                  |
| 22                            | 41.3±0.5 | 41.8±1.4 | 12.6±0.6 | 4.1±0.5 | 0.2±0.1 | 0.99±0.04 | 0.23±0.01                  |
| 26                            | 37.9±1.0 | 45.0±0.5 | 16.4±0.5 | 0.3±0.5 | 0.4±0.2 | 0.84±0.02 | 0.20±0.01                  |

<sup>a</sup> Relative yield (%); the sum of relative yields of all products is taken as 100%; the mass balance is > 80%; entries are the average values from at least 3 HPLC analyses on two separate runs with an error of one standard deviation; < 1.5% of 4 was observed when the conversion of (*R*)-2 was > 11%.

**Table S8.** *Ee*% of photoproducts from irradiations of (*R*)-2<sup>a</sup> in stretched PE46 films at 23 °C<sup>b</sup>

| % Conversion of ( <i>R</i> )-2 | <i>ee</i> % |      |      |
|--------------------------------|-------------|------|------|
|                                | remaining 2 | 2BN  | 4BN  |
| 5                              | 98.4        | 41.4 | 25.2 |
| 6                              | 97.2        | 39.4 | 23.0 |
| 7                              | 97.2        | 38.7 | 23.0 |
| 9                              | 96.2        | 37.8 | 23.0 |
| 10                             | 96.2        | 37.6 | 23.0 |
| 11                             | 96.4        | 38.2 | 22.8 |

|    |      |      |      |
|----|------|------|------|
| 19 | 91.8 | 34.8 | 20.1 |
| 22 | 89.6 | 30.6 | 19.0 |
| 26 | 88.0 | 32.0 | 19.6 |

<sup>a</sup> *ee* of (*R*)-**2** before irradiation is 99.5%. <sup>b</sup> ± 1.0%.

**Table S9.** Product Distributions from Irradiations of (*R*)-**1** in **PE** Films (1-7 mmol/kg) and *n*-Hexane (2 mM) at Various Temperatures<sup>a</sup>

| Medium <sup>b</sup> | T (°C) | conversion % | <b>2</b> | <b>2BN</b> | <b>4BN</b> | <b>2AN</b> | <b>4AN</b> | <b>3</b> | <b>4</b> | <b>5</b> |
|---------------------|--------|--------------|----------|------------|------------|------------|------------|----------|----------|----------|
| Hexane <sup>c</sup> | 23     | 12-32        | 3.3±0.1  | 4.6±0.3    | 13.3±0.5   | 46.5±2.7   | 24.6±2.0   | 4.9±0.4  | 0        | 2.8±0.8  |
| <b>PE0</b> (u)      | - 8    | 10-15        | 0.9±0.1  | 1.3±0.1    | 6.1±0.5    | 76.2±1.0   | 6.5±0.5    | 4.6±0.1  | 3.2±0.3  | 1.2±0.2  |
|                     | 5      | 19-21        | 0.9±0.1  | 1.9±0.1    | 6.9±0.4    | 75.0±0.5   | 7.9±0.4    | 4.5±0.6  | 2.2±1.1  | 0.6±0.1  |
|                     | 23     | 20-25        | 1.0±0.1  | 1.4±0.1    | 5.6±0.8    | 70.5±2.5   | 13.6±0.4   | 5.2±0.5  | 2.1±1.2  | 0.7±0.3  |
|                     | 43     | 18-21        | 0.9±0.1  | 0.9±0.1    | 6.3±0.5    | 64.8±1.6   | 13.4±0.6   | 7.1±0.8  | 5.3±0.4  | 1.4±0.1  |
|                     | 60     | 20-21        | 1.1±0.1  | 1.0±0.1    | 5.7±0.1    | 61.3±0.3   | 15.4±0.3   | 10.1±1.3 | 4.2±1.4  | 1.3±0.1  |
| <b>PE0</b> (s)      | 23     | 26-28        | 0.8±0.1  | 1.2±0.1    | 4.9±0.2    | 71.3±2.0   | 12.0±0.2   | 7.4±2.0  | 1.9±0.1  | 0.5±0.2  |
| <b>PE46</b> (u)     | 5      | 24-35        | 1.3±0.2  | 1.9±0.2    | 8.0±1.0    | 70.3± 2.5  | 4.7±0.9    | 3.4±0.3  | 9.4±3.0  | 1.0±0.3  |
|                     | 23     | 29-34        | 1.1±0.1  | 0.9±0.1    | 3.4±0.5    | 75.8±0.3   | 7.6±0.3    | 2.0±0.8  | 9.0±0.7  | 0.2±0.1  |
|                     | 43     | 23-32        | 1.0±0.1  | 1.2±0.1    | 6.0±1.0    | 63.6±1.3   | 10.5±1.0   | 9.6±0.9  | 6.7±0.3  | 1.6±0.2  |
|                     | 60     | 25-33        | 0.8±0.1  | 0.8±0.1    | 2.1±0.3    | 63.7±0.5   | 13.0±1.5   | 11.9±1.1 | 6.4±0.1  | 1.5±0.1  |
| <b>PE46</b> (s)     | 5      | 26-30        | 3.9±0.1  | 5.4±0.2    | 28.9±0.2   | 42.5±0.9   | 5.2±0.1    | 5.9±0.1  | 5.0±1.0  | 3.3±0.1  |
|                     | 23     | 27-37        | 1.5±0.2  | 1.2±0.1    | 8.7±0.6    | 78.1±0.6   | 5.9±0.1    | 2.6±0.1  | 1.6±0.1  | 0.4±0.1  |
|                     | 43     | 25-28        | 1.0±0.1  | 1.4±0.1    | 8.1±0.4    | 58.1±2.1   | 9.0±1.2    | 8.0±0.7  | 11.6±0.8 | 2.8±0.6  |
| <b>PE74</b> (u)     | 5      | 23           | 1.9±0.3  | 2.7±0.4    | 8.8±1.2    | 65.8±2.5   | 7.4±1.2    | 3.8±1.2  | 8.8±1.5  | 0.8±0.1  |
|                     | 23     | 26           | 0.9±0.1  | 1.6±0.2    | 4.2±0.2    | 80.1±2.3   | 9.1±1.0    | 2.1±0.3  | 2.0±0.1  | 0        |
| <b>PE74</b> (s)     | 5      | 17           | 5.6±0.5  | 6.5±0.5    | 29.0±3.5   | 39.9±3.0   | 6.7±0.5    | 5.6±1.0  | 3.4±0.3  | 3.3±0.3  |
|                     | 23     | 20           | 2.2±0.5  | 4.5±0.5    | 13.9±2.0   | 52.5±3.0   | 11.6±1.0   | 3.8±0.5  | 9.1±1.5  | 2.4±0.5  |

<sup>a</sup> Relative yield (%); the sum of relative yields of all products is taken as 100%. The mass balance is > 80% and conversions of **1** were < 35%. Each entry is the average of at least 2 experiments and 3 HPLC analyses with an error of one standard deviation. <sup>b</sup> ‘u’ and ‘s’ refer to unstretched and stretched films, respectively. <sup>c</sup> Small amounts of a decarboxylated product, 1-(1-naphthyl)-1-phenylethane (< 2%), and a cage-escape product **6** (*ca.* 7%) are not reported.

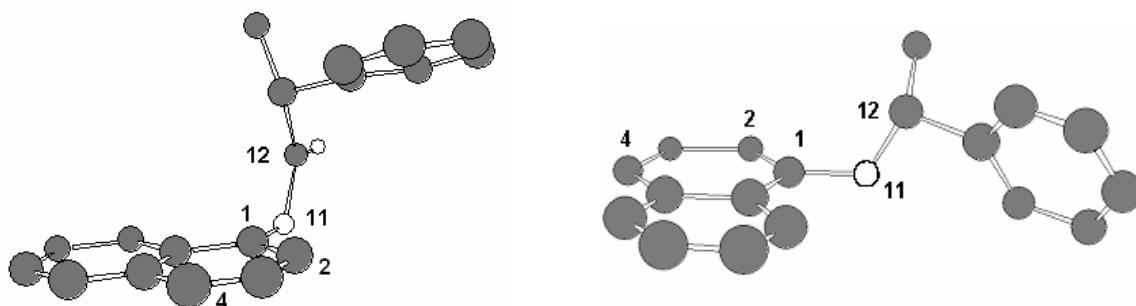

**Figure S5.** Calculated optimized geometries of **1-L** (left) and **2-L** (right) in their ground states. The solid and open circles represent carbon and oxygen atoms, respectively; hydrogen atoms have not been included for clarity.

**Table S10.** Cartesian coordinates of optimized **1-G** in its ground state calculated at the RHF/6-31G\* level.

| Center Number | Atomic Number | Atomic Type | Coordinates (Angstroms) |           |           |
|---------------|---------------|-------------|-------------------------|-----------|-----------|
|               |               |             | X                       | Y         | Z         |
| 1             | 6             | 0           | -1.159488               | 1.461056  | -0.258454 |
| 2             | 6             | 0           | -1.681463               | 2.697842  | -0.050605 |
| 3             | 6             | 0           | -3.062431               | 2.860370  | 0.215931  |
| 4             | 6             | 0           | -3.881193               | 1.778371  | 0.264386  |
| 5             | 6             | 0           | -3.371050               | 0.469886  | 0.052403  |
| 6             | 6             | 0           | -1.994363               | 0.312876  | -0.207905 |
| 7             | 6             | 0           | -1.505688               | -1.004033 | -0.415609 |
| 8             | 6             | 0           | -2.318828               | -2.084913 | -0.380166 |
| 9             | 6             | 0           | -3.697675               | -1.914211 | -0.115648 |
| 10            | 6             | 0           | -4.209552               | -0.675129 | 0.095335  |
| 11            | 8             | 0           | -0.166443               | -1.145522 | -0.728023 |
| 12            | 6             | 0           | 0.688580                | -1.656562 | 0.169043  |
| 13            | 6             | 0           | 2.108485                | -1.627341 | -0.367224 |
| 14            | 6             | 0           | 2.961105                | -2.718767 | 0.287277  |
| 15            | 6             | 0           | 2.696425                | -0.232662 | -0.174269 |
| 16            | 6             | 0           | 3.196322                | 0.475610  | -1.258946 |
| 17            | 6             | 0           | 3.758356                | 1.731700  | -1.087667 |
| 18            | 6             | 0           | 3.822252                | 2.297766  | 0.173666  |
| 19            | 6             | 0           | 3.320291                | 1.601130  | 1.262239  |
| 20            | 6             | 0           | 2.762642                | 0.345948  | 1.090449  |
| 21            | 8             | 0           | 0.367853                | -2.057058 | 1.235505  |
| 22            | 1             | 0           | -0.114050               | 1.341570  | -0.466519 |
| 23            | 1             | 0           | -1.044050               | 3.562847  | -0.089026 |
| 24            | 1             | 0           | -3.458561               | 3.846822  | 0.378200  |
| 25            | 1             | 0           | -4.931457               | 1.897420  | 0.464766  |
| 26            | 1             | 0           | -1.913410               | -3.065480 | -0.543982 |
| 27            | 1             | 0           | -4.334230               | -2.779633 | -0.083598 |
| 28            | 1             | 0           | -5.258040               | -0.544643 | 0.296413  |
| 29            | 1             | 0           | 2.042257                | -1.814287 | -1.432026 |
| 30            | 1             | 0           | 3.966270                | -2.689750 | -0.117600 |
| 31            | 1             | 0           | 3.016893                | -2.582493 | 1.358974  |

|    |   |   |          |           |           |
|----|---|---|----------|-----------|-----------|
| 32 | 1 | 0 | 2.542259 | -3.701238 | 0.097507  |
| 33 | 1 | 0 | 3.148082 | 0.046088  | -2.244211 |
| 34 | 1 | 0 | 4.142441 | 2.264543  | -1.939219 |
| 35 | 1 | 0 | 4.256522 | 3.272204  | 0.308503  |
| 36 | 1 | 0 | 3.361320 | 2.034940  | 2.245351  |
| 37 | 1 | 0 | 2.370109 | -0.181892 | 1.941195  |

-----  
Calculations of optimized **1-G** in its ground state calculated at the RHF/6-31G\* level also provide:

- (1) SCF Done: E (RHF) = -878.577303668 A.U.
- (2) Zero-point correction = 0.321376 (Hartree/Particle)
- (3) Number of imaginary frequencies: 0

Calculations of optimized **1-G** in its ground state calculated at the B3LYP/6-31G\* level provide:

- (1) SCF Done: E(RB+HF-LYP) = -884.132267205 A.U.
- (2) Zero-point correction = 0.299866 (Hartree/Particle)
- (3) Number of imaginary frequencies: 0

**Table S11.** Cartesian coordinates of optimized **1-L** in its ground state calculated at the RHF/6-31G\* level.

| Center Number | Atomic Number | Atomic Type | Coordinates (Angstroms) |           |           |
|---------------|---------------|-------------|-------------------------|-----------|-----------|
|               |               |             | X                       | Y         | Z         |
| 1             | 6             | 0           | 2.742877                | -1.296400 | -0.112734 |
| 2             | 6             | 0           | 3.939130                | -1.410913 | 0.522161  |
| 3             | 6             | 0           | 4.638014                | -0.257241 | 0.950252  |
| 4             | 6             | 0           | 4.122802                | 0.978851  | 0.722347  |
| 5             | 6             | 0           | 2.876847                | 1.136777  | 0.060463  |
| 6             | 6             | 0           | 2.177407                | -0.015751 | -0.351492 |
| 7             | 6             | 0           | 0.922413                | 0.161321  | -0.998351 |
| 8             | 6             | 0           | 0.419730                | 1.392050  | -1.255195 |
| 9             | 6             | 0           | 1.136560                | 2.542063  | -0.845048 |
| 10            | 6             | 0           | 2.324506                | 2.419809  | -0.200837 |
| 11            | 8             | 0           | 0.256803                | -0.957162 | -1.441671 |
| 12            | 6             | 0           | -0.640542               | -1.654487 | -0.720118 |
| 13            | 6             | 0           | -1.090113               | -1.111941 | 0.631772  |
| 14            | 6             | 0           | -1.406567               | -2.279563 | 1.576391  |
| 15            | 6             | 0           | -2.292770               | -0.185567 | 0.461495  |
| 16            | 6             | 0           | -2.325647               | 1.034278  | 1.126687  |
| 17            | 6             | 0           | -3.429692               | 1.865654  | 1.030080  |
| 18            | 6             | 0           | -4.517365               | 1.489229  | 0.259954  |
| 19            | 6             | 0           | -4.493017               | 0.276316  | -0.409016 |
| 20            | 6             | 0           | -3.390879               | -0.556901 | -0.307952 |
| 21            | 8             | 0           | -1.061333               | -2.658744 | -1.182729 |
| 22            | 1             | 0           | 2.225922                | -2.172368 | -0.455959 |
| 23            | 1             | 0           | 4.364604                | -2.382742 | 0.696109  |
| 24            | 1             | 0           | 5.582982                | -0.365770 | 1.451454  |



|    |   |   |           |           |           |
|----|---|---|-----------|-----------|-----------|
| 25 | 1 | 0 | 4.655170  | 1.858158  | 1.039499  |
| 26 | 1 | 0 | -0.521072 | 1.485221  | -1.763623 |
| 27 | 1 | 0 | 0.724928  | 3.513492  | -1.049751 |
| 28 | 1 | 0 | 2.867611  | 3.293197  | 0.113662  |
| 29 | 1 | 0 | -0.284971 | -0.532714 | 1.061724  |
| 30 | 1 | 0 | -1.716647 | -1.891086 | 2.539715  |
| 31 | 1 | 0 | -2.200367 | -2.896625 | 1.178763  |
| 32 | 1 | 0 | -0.532819 | -2.905658 | 1.723741  |
| 33 | 1 | 0 | -1.482741 | 1.339352  | 1.721782  |
| 34 | 1 | 0 | -3.437360 | 2.805194  | 1.553501  |
| 35 | 1 | 0 | -5.374346 | 2.133992  | 0.181172  |
| 36 | 1 | 0 | -5.332264 | -0.024416 | -1.010421 |
| 37 | 1 | 0 | -3.384536 | -1.495488 | -0.831317 |

-----  
Calculations of optimized **1-L** in its ground state calculated at the RHF/6-31G\* level also provide:

- (1) SCF Done: E(RHF) = -878.567723837 A.U.
- (2) Zero-point correction = 0.321495 (Hartree/Particle)
- (3) Number of imaginary frequencies: 0

Calculations of optimized **1-L** in its ground state calculated at the B3LYP/6-31G\* level provide:

- (1) SCF Done: E(RB+HF-LYP) = -884.124918119 A.U.
- (2) Zero-point correction = 0.299707 (Hartree/Particle)
- (3) Number of imaginary frequencies: 0

**Table S12.** Cartesian coordinates of optimized **1-G** in its first excited singlet state calculated at the CIS/6-31G\* level.

| Center Number | Atomic Number | Atomic Type | Coordinates (Angstroms) |           |           |
|---------------|---------------|-------------|-------------------------|-----------|-----------|
|               |               |             | X                       | Y         | Z         |
| 1             | 6             | 0           | -1.196896               | 1.473747  | -0.293159 |
| 2             | 6             | 0           | -1.767003               | 2.727683  | -0.096614 |
| 3             | 6             | 0           | -3.143350               | 2.857964  | 0.181814  |
| 4             | 6             | 0           | -3.951308               | 1.728882  | 0.259894  |
| 5             | 6             | 0           | -3.431570               | 0.440044  | 0.068409  |
| 6             | 6             | 0           | -1.973554               | 0.308130  | -0.216549 |
| 7             | 6             | 0           | -1.472288               | -0.988666 | -0.396341 |
| 8             | 6             | 0           | -2.273613               | -2.118794 | -0.333374 |
| 9             | 6             | 0           | -3.649371               | -1.981483 | -0.062816 |
| 10            | 6             | 0           | -4.210298               | -0.724858 | 0.133277  |
| 11            | 8             | 0           | -0.139226               | -1.112742 | -0.724122 |
| 12            | 6             | 0           | 0.727374                | -1.669624 | 0.134639  |
| 13            | 6             | 0           | 2.141234                | -1.600246 | -0.413024 |
| 14            | 6             | 0           | 3.017183                | -2.699972 | 0.194630  |
| 15            | 6             | 0           | 2.708855                | -0.203675 | -0.177779 |
| 16            | 6             | 0           | 3.188523                | 0.548869  | -1.241517 |
| 17            | 6             | 0           | 3.732055                | 1.807261  | -1.031760 |
| 18            | 6             | 0           | 3.797326                | 2.331129  | 0.247615  |
| 19            | 6             | 0           | 3.315320                | 1.590015  | 1.315606  |

|    |   |   |           |           |           |
|----|---|---|-----------|-----------|-----------|
| 20 | 6 | 0 | 2.776190  | 0.332635  | 1.105273  |
| 21 | 8 | 0 | 0.418140  | -2.132263 | 1.179044  |
| 22 | 1 | 0 | -0.149123 | 1.393846  | -0.507782 |
| 23 | 1 | 0 | -1.149784 | 3.604486  | -0.157301 |
| 24 | 1 | 0 | -3.568695 | 3.832389  | 0.333050  |
| 25 | 1 | 0 | -5.000231 | 1.836761  | 0.471363  |
| 26 | 1 | 0 | -1.836970 | -3.086953 | -0.479712 |
| 27 | 1 | 0 | -4.265431 | -2.858949 | -0.007787 |
| 28 | 1 | 0 | -5.261967 | -0.636878 | 0.338867  |
| 29 | 1 | 0 | 2.066770  | -1.751336 | -1.483113 |
| 30 | 1 | 0 | 4.017206  | -2.641645 | -0.219655 |
| 31 | 1 | 0 | 3.083136  | -2.599356 | 1.269718  |
| 32 | 1 | 0 | 2.610939  | -3.681647 | -0.023863 |
| 33 | 1 | 0 | 3.139077  | 0.152330  | -2.240440 |
| 34 | 1 | 0 | 4.100910  | 2.374729  | -1.867526 |
| 35 | 1 | 0 | 4.217296  | 3.307242  | 0.412235  |
| 36 | 1 | 0 | 3.357456  | 1.990856  | 2.312557  |
| 37 | 1 | 0 | 2.399244  | -0.230071 | 1.940674  |

-----  
Calculations of optimized **1-G** in its first excited singlet state calculated at the CIS/6-31G\* level also provide:

- (1) SCF Done: E(RHF) = -878.569502367 A.U.
- (2) Zero-point correction = 0.318721 (Hartree/Particle)
- (3) Number of imaginary frequencies: 0
- (4) Excited state 1: Singlet-?Sym 5.1744 eV 239.61 nm f=0.0013  
72 → 74 -0.48138  
73 → 75 0.50239

This state for optimization and/or second-order correction.

**Table S13.** Cartesian coordinates of optimized **1-L** in its first excited singlet state calculated at the CIS/6-31G\* level.

| Center Number | Atomic Number | Atomic Type | Coordinates (Angstroms) |           |           |
|---------------|---------------|-------------|-------------------------|-----------|-----------|
|               |               |             | X                       | Y         | Z         |
| 1             | 6             | 0           | 2.738835                | -1.304971 | -0.141307 |
| 2             | 6             | 0           | 3.958281                | -1.420636 | 0.517786  |
| 3             | 6             | 0           | 4.643520                | -0.272848 | 0.967850  |
| 4             | 6             | 0           | 4.115177                | 0.993214  | 0.741571  |
| 5             | 6             | 0           | 2.893644                | 1.170060  | 0.074275  |
| 6             | 6             | 0           | 2.156473                | -0.048102 | -0.367673 |
| 7             | 6             | 0           | 0.918364                | 0.145312  | -1.000043 |
| 8             | 6             | 0           | 0.406377                | 1.407305  | -1.269753 |
| 9             | 6             | 0           | 1.121347                | 2.552130  | -0.865036 |
| 10            | 6             | 0           | 2.337098                | 2.427862  | -0.201516 |
| 11            | 8             | 0           | 0.234457                | -0.953079 | -1.451270 |
| 12            | 6             | 0           | -0.650090               | -1.662094 | -0.721185 |

|    |   |   |           |           |           |
|----|---|---|-----------|-----------|-----------|
| 13 | 6 | 0 | -1.090889 | -1.119886 | 0.633197  |
| 14 | 6 | 0 | -1.408464 | -2.286219 | 1.578314  |
| 15 | 6 | 0 | -2.288764 | -0.187085 | 0.466689  |
| 16 | 6 | 0 | -2.307752 | 1.038655  | 1.121467  |
| 17 | 6 | 0 | -3.407510 | 1.876068  | 1.027563  |
| 18 | 6 | 0 | -4.504174 | 1.500027  | 0.270324  |
| 19 | 6 | 0 | -4.493512 | 0.281311  | -0.388606 |
| 20 | 6 | 0 | -3.395988 | -0.557973 | -0.289889 |
| 21 | 8 | 0 | -1.068637 | -2.666883 | -1.183141 |
| 22 | 1 | 0 | 2.242295  | -2.187192 | -0.498109 |
| 23 | 1 | 0 | 4.382843  | -2.393402 | 0.680630  |
| 24 | 1 | 0 | 5.581970  | -0.377397 | 1.479103  |
| 25 | 1 | 0 | 4.652116  | 1.862644  | 1.076641  |
| 26 | 1 | 0 | -0.531298 | 1.491973  | -1.782925 |
| 27 | 1 | 0 | 0.718891  | 3.525515  | -1.072011 |
| 28 | 1 | 0 | 2.869949  | 3.310307  | 0.104121  |
| 29 | 1 | 0 | -0.279255 | -0.545803 | 1.057831  |
| 30 | 1 | 0 | -1.711347 | -1.897194 | 2.543647  |
| 31 | 1 | 0 | -2.207569 | -2.899233 | 1.184813  |
| 32 | 1 | 0 | -0.536914 | -2.916547 | 1.720085  |
| 33 | 1 | 0 | -1.457837 | 1.343556  | 1.706448  |
| 34 | 1 | 0 | -3.404609 | 2.820037  | 1.542901  |
| 35 | 1 | 0 | -5.357764 | 2.149501  | 0.193648  |
| 36 | 1 | 0 | -5.339919 | -0.019003 | -0.980062 |
| 37 | 1 | 0 | -3.399944 | -1.500839 | -0.805623 |

-----  
Calculations of optimized **1-L** in its first excited singlet state calculated at the CIS/6-31G\* level provide:

- (1) SCF Done: E(RHF) = -878.559929026 A.U.
- (2) Zero-point correction = 0.318729 (Hartree/Particle)
- (3) Number of imaginary frequencies: 0
- (4) Excited State 1: Singlet-?Sym 5.1548 eV 240.52 nm f=0.0019

|         |          |
|---------|----------|
| 71 → 74 | -0.12316 |
| 72 → 74 | -0.45380 |
| 73 → 75 | 0.49603  |

This state for optimization and/or second-order correction.
